# Supplementary material for: Inflammaging as a link between autoimmunity and cardiovascular disease: the case of rheumatoid arthritis
Source: HighWire-hosted journal article supplement (doi:10.1136/rmdopen-2020-001470), 2021-01-01
Supplement: rmdopen-2020-001470supp002_data_supplement.pdf [file rmdopen-2020-001470supp002_data_supplement.pdf]

**supplementary Table S2** Studies that compare pulse wave velocity in patients with rheumatoid arthritis vs healthy subjects

| Study                                                                                                                                                | Authors              | year | N arthritis | N controls | Female cases | Female controls | Age case    | Age controls | DAS 28      | Control variables | Measurement technique                                               | PWV Cases [m/s]    | PWV Controls [m/s] | P value |
|------------------------------------------------------------------------------------------------------------------------------------------------------|----------------------|------|-------------|------------|--------------|-----------------|-------------|--------------|-------------|-------------------|---------------------------------------------------------------------|--------------------|--------------------|---------|
| Rheumatoid arthritis is associated with increased aortic pulse-wave velocity, which is reduced by anti-tumor necrosis factor-alpha therapy.          | Mäki-Petäjä KM et al | 2006 | 77          | 142        | 62           | 104             | 57±13       | 57±11        | 4.33 ± 1.48 | No                | SphygmoCor, AtCor Medical, Sydney, Australia                        | 8.35 (7.14–10.24)  | 7.52 (6.56–9.18)   | 0.005   |
| Par articular trabecular bone loss at the ultradistal radius and increased arterial stiffening in postmenopausal patients with rheumatoid arthritis. | Tanaka K et al       | 2006 | 47          | 49         | 47           | 49              | 59.6 ± 14.1 | 56.7 ± 7.4   | NA          | No                | Automatic waveform analyzer (model BP-203RPE; Colin, Komaki, Japan) | 11.24 (10.4–11.75) | 9.89 (8.19–10.54)  | < 0.001 |
| Forearm haemodynamics, arterial stiffness and microcirculatory reactivity in rheumatoid arthritis.                                                   | Arosio E et al       | 2007 | 65          | 40         | 65           | 40              | 47±6        | 45±5         | 3.7 ± 1.1   |                   | Doppler                                                             | 9.3±0.2            | 8.4±0.4            | <0.05   |

|                                                                                                                                                                                                       |                          |      |      |    |    |    |                 |                 |                 |    |                                                                      |                 |                 |         |
|-------------------------------------------------------------------------------------------------------------------------------------------------------------------------------------------------------|--------------------------|------|------|----|----|----|-----------------|-----------------|-----------------|----|----------------------------------------------------------------------|-----------------|-----------------|---------|
| Non-invasive Assessment of Arterial Stiffness Indices by Applanation Tonometry and Pulse Wave Analysis in Patients with Rheumatoid Arthritis Treated with TNF- $\alpha$ Blocker Remicade (infliximab) | Cypiene A et al          | 2007 | 68   | 87 | 59 | 56 | 40.68 (10.07)   | 38.10 (8.69)    | 5.37 [0.94]     | NO | Sphygmo Cor, AtCor Medical, Sydney, Australia                        | 8.42 $\pm$ 1.02 | 8.21 $\pm$ 1.14 | 0.315   |
| Increased arterial stiffness and indication of endothelial dysfunction in long-standing rheumatoid arthritis                                                                                          | Wallberg-Jonsson S et al | 2008 | 30   | 30 | 23 | 23 | 53.5            | 54              | 3.83 [2.24]     | NO | Sphygmo Cor, AtCor Medical, Sydney, Australia                        | 6.0 $\pm$ 2.0   | 5.5 $\pm$ 0.6   | <0.001  |
| Osteopontin is Associated with Increased Arterial Stiffness in Rheumatoid Arthritis                                                                                                                   | Bazzichi L et al         | 2009 | 41   | 18 | 30 | 13 | 57.2 $\pm$ 9.9  | 54.9 $\pm$ 7.8  | 3.60 $\pm$ 1.42 | NO | Sphygmo Cor, AtCor Medical, Sydney, Australia                        | 8.1 [4.7–16.4]  | 7.5 [4.1–10.4]  | <0.01   |
| A comparative study of arterial stiffness, flow-mediated vasodilation of the brachial artery, and the thickness of the carotid artery intima-media in patients with systemic autoimmune diseases.     | Soltész P et al          | 2009 | 101* | 36 | 77 | 26 | 52.3 $\pm$ 13.3 | 50.3 $\pm$ 10.4 | NA              | no | TensioClinic arteriograph system [TensioMed Kft., Debrecen, Hungary] | 9.66 $\pm$ 2.40 | 8.00 $\pm$ 1.46 | <0.0002 |

|                                                                                                                                                                                    |                   |      |    |     |    |    |            |            |              |    |                                               |            |            |        |
|------------------------------------------------------------------------------------------------------------------------------------------------------------------------------------|-------------------|------|----|-----|----|----|------------|------------|--------------|----|-----------------------------------------------|------------|------------|--------|
| Paradoxical Association of C-Reactive Protein with Endothelial Function in Rheumatoid Arthritis                                                                                    | Holmes M et al    | 2010 | 59 | 123 | 48 | 73 | 50.85±8.63 | 48.97±9.87 | 5.786 ± 1.10 |    | Sphygmo Cor, AtCor Medical, Sydney, Australia | 8.696±0.18 | 8.026±0.12 | <0.01  |
| Arterial stiffness in a muscular artery in women with long standing rheumatoid arthritis compared with healthy controls and patients with traditional cardiovascular risk factors. | Pieringer H et al | 2010 | 30 | 30  | 30 | 30 | 45.6 ±8.0  | 44.4 ±6.3  | 3.7 ± 1.6    | NO | Sphygmo Cor, AtCor Medical, Sydney, Australia | 8.6±0.9    | 8.1±0.7    | <0.02  |
| Relationship between pulse wave velocity and serum YKL-40 level in patients with early rheumatoid arthritis                                                                        | Turkylmaz A et al | 2012 | 42 | 35  | 33 | 28 | 43.1 ± 5.8 | 41.0 ± 5.9 | 5.8 ± 0.7    | NO | Sphygmo Cor, AtCor Medical, Sydney, Australia | 9.8 ± 2.9  | 6.9 ± 1.5  | <0.05  |
| Relationship of osteoprotegerin to pulse wave velocity and carotid intima-media thickness in rheumatoid arthritis patients                                                         | Beyazal MS et al  | 2015 | 68 | 48  | 56 | 37 | 48.4±8.1   | 46.6±6.2   | 3.73 ± 1.4   | NO | Sphygmo Cor, AtCor Medical, Sydney, Australia | 8.2±1.9    | 6.2±1.2    | <0.001 |

|                                                                                                                                                             |                          |      |     |     |     |     |             |             |             |    |                                              |               |                |       |
|-------------------------------------------------------------------------------------------------------------------------------------------------------------|--------------------------|------|-----|-----|-----|-----|-------------|-------------|-------------|----|----------------------------------------------|---------------|----------------|-------|
| Rheumatoid arthritis is sufficient to cause atheromatosis but not arterial stiffness or hypertrophy in the absence of classical cardiovascular risk factors | Aikaterini A et al       | 2015 | 41  | 41  | 36  | 36  | 49.12±12.95 | 49.17±13.35 | 3.72 ± 1.35 | NO | SphygmoCor, AtCor Medical, Sydney, Australia | 7.65±1.37     | 7.54±1.32      | 0.678 |
| Arterial stiffness is associated with left ventricular dysfunction in patients with rheumatoid arthritis                                                    | Ilter A et al            | 2016 | 35  | 25  | 30  | 17  | 47.1±6.3    | 46.8±6.9    | 3.9± 1.7    | NO | SphygmoCor, AtCor Medical, Sydney, Australia | 10.2±2.3      | 9.2±1          | 0.01  |
| The Assessment of Subclinical Cardiovascular Dysfunction in Treated Rheumatoid Arthritis                                                                    | Magda S et al            | 2016 | 29  | 17  | 28  | 16  | 55.5 ± 9.6  | 55.1 ± 10.1 | NA          | NO | Complior, Artech Medical, Paris, France      | 9.9 ± 2       | 10.1 ± 1.5     | NS    |
| Arterial stiffness is not increased in patients with short duration rheumatoid arthritis and ankylosing spondylitis.                                        | Dzieża-Grudnik A et al** | 2017 | 26  | 29  | 21  | 13  | 40 ± 9.7    | 32 ± 7.6    | 4.4 ± 1.5   | NO | Complior, Colson, Garges-les-Gonesse, France | 10 [8.8–10.9] | 9.2 [8.3–11.4] | 0.14  |
| Atherosclerosis is not accelerated in rheumatoid arthritis of low activity or remission, regardless of antirheumatic treatment modalities                   | Arida A et al            | 2017 | 139 | 139 | 117 | 116 | 56.7 (11.7) | 55.6 (13.4) | <3.2        | NO | Doppler SphygmoCor, AtCor, Sydney, Australia | 8.4±1.8       | 8.7±2.2        | 0.152 |

|                                                                                                                                                                           |                  |      |     |    |    |    |              |              |               |    |                                               |             |             |        |
|---------------------------------------------------------------------------------------------------------------------------------------------------------------------------|------------------|------|-----|----|----|----|--------------|--------------|---------------|----|-----------------------------------------------|-------------|-------------|--------|
| Increased arterial stiffness in rheumatoid arthritis and its relation to disease activity: A cross sectional study                                                        | Youssef G et al  | 2017 | 90  | 45 | 75 | 37 | 39.86 ± 9.39 | 37.82 ± 9.62 | NA            | NO | Doppler                                       | 8.57 ± 4.83 | 4.08 ± 1.13 | 0.001  |
| Subclinical impairment of myocardial and endothelial functionality in very early psoriatic and rheumatoid arthritis patients: Association with vitamin D and inflammation | Lo Gullo A et al | 2018 | 41  | 58 | 32 | 35 | 46 (32 – 62) | 46 (32 – 62) | 3.61 ± 0.88   | NO | Doppler                                       | 7.91 ± 1.93 | 5.11 ± 0.83 | <0.001 |
| Association of non-invasive hemodynamics with arterial stiffness in rheumatoid arthritis                                                                                  | Anyfanti P et al | 2018 | 104 | 52 | 82 | 41 | 60.0 ± 11.4  | 57.2 ± 8.2   | 3.5 ± 1.2     | NO | Sphygmo Cor, AtCor Medical, Sydney, Australia | 8.2 ± 2.1   | 7.4 ± 1.4   | 0.016  |
| Stiffening of aorta is more preferentially associated with rheumatoid arthritis than peripheral arteries                                                                  | Yang Y et al     | 2019 | 72  | 55 | 59 | 45 | 47.4 ± 6.88  | 46.2 ± 6.72  | 3.79, 2.7–6.1 |    | Doppler                                       | 7.94 ± 2.07 | 6.70 ± 1.23 | 0.0001 |

DAS 28: Disease Activity Score. \*: 101 with autoimmune disease, 14 with Rheumatoid arthritis. \*\*There were no age differences between cases and controls except for this study. NS: non-significant
