# Supplementary material for: Inflammaging as a link between autoimmunity and cardiovascular disease: the case of rheumatoid arthritis
Source: HighWire-hosted journal article supplement (doi:10.1136/rmdopen-2020-001470), 2021-01-01
Supplement: rmdopen-2020-001470supp004_data_supplement.pdf [file rmdopen-2020-001470supp004_data_supplement.pdf]

**Supplementary Table S3 A** Results of the methodological quality assessment based on The Joanna Briggs Institute Critical Appraisal Checklist for Case control studies

| Author/year          | Were the groups comparable in ways other than the presence of disease in cases or the absence of disease in controls? | Were cases and controls matched appropriately? | Were the same criteria used for identification of cases and controls? | Was exposure measured in a standard, valid and reliable way? | Was exposure measured the same way for cases and controls? | Were confounding factors identified? | Were strategies to deal with confounding factors stated? | Were outcomes assessed in a standard, valid and reliable way for cases and controls? | Was the exposure period of interest long enough to be meaningful? | Was an appropriate statistical analysis used? | Overall appraisal |
|----------------------|-----------------------------------------------------------------------------------------------------------------------|------------------------------------------------|-----------------------------------------------------------------------|--------------------------------------------------------------|------------------------------------------------------------|--------------------------------------|----------------------------------------------------------|--------------------------------------------------------------------------------------|-------------------------------------------------------------------|-----------------------------------------------|-------------------|
| Aikaterini A et al   | Y                                                                                                                     | Y                                              | Y                                                                     | Y                                                            | Y                                                          | Y                                    | U                                                        | Y                                                                                    | Y                                                                 | Y                                             | I                 |
| Anyfanti P et al     | Y                                                                                                                     | Y                                              | Y                                                                     | Y                                                            | Y                                                          | Y                                    | Y                                                        | Y                                                                                    | Y                                                                 | Y                                             | I                 |
| Arida A et al        | Y                                                                                                                     | Y                                              | Y                                                                     | Y                                                            | Y                                                          | Y                                    | Y                                                        | Y                                                                                    | Y                                                                 | Y                                             | I                 |
| Bazzichi L et al     | Y                                                                                                                     | Y                                              | Y                                                                     | Y                                                            | Y                                                          | Y                                    | U                                                        | Y                                                                                    | Y                                                                 | Y                                             | I                 |
| Cypiene A et al      | Y                                                                                                                     | U                                              | Y                                                                     | Y                                                            | Y                                                          | Y                                    | Y                                                        | Y                                                                                    | Y                                                                 | Y                                             | I                 |
| Holmes M et al       | Y                                                                                                                     | Y                                              | Y                                                                     | Y                                                            | Y                                                          | Y                                    | Y                                                        | Y                                                                                    | Y                                                                 | Y                                             | I                 |
| Ilter A et al        | Y                                                                                                                     | U                                              | Y                                                                     | Y                                                            | Y                                                          | Y                                    | U                                                        | Y                                                                                    | Y                                                                 | Y                                             | I                 |
| Mäki-Petäjä KM et al | Y                                                                                                                     | Y                                              | Y                                                                     | Y                                                            | Y                                                          | Y                                    | Y                                                        | Y                                                                                    | Y                                                                 | Y                                             | I                 |

Y:Yes; N: No; U:Unclear; NA: Not apply; I: included. The level of evidence was IV using Oxford Centre for Evidence-Based Medicine 2011 Levels of Evidence Question (OCEBM) (Is this diagnostic or monitoring test accurate?).

**Supplementary Table S3 B** Results of the methodological quality assessment based on The Joanna Briggs Institute Critical Appraisal Checklist for Cross Sectional studies.

| Author/year              | Were the criteria for inclusion in the sample clearly defined? | Were the study subjects and the setting described in detail? | Was the exposure measured in a valid and reliable way? | Were objective, standard criteria used for measurement of the condition? | Were confounding factors identified? | Were strategies to deal with confounding factors stated? | Were the outcomes measured in a valid and reliable way? | Was appropriate statistical analysis used? | Overall appraisal |
|--------------------------|----------------------------------------------------------------|--------------------------------------------------------------|--------------------------------------------------------|--------------------------------------------------------------------------|--------------------------------------|----------------------------------------------------------|---------------------------------------------------------|--------------------------------------------|-------------------|
| Beyazal MS et al         | Y                                                              | U                                                            | Y                                                      | Y                                                                        | Y                                    | U                                                        | Y                                                       | Y                                          | I                 |
| Pieringer H et al        | Y                                                              | U                                                            | Y                                                      | Y                                                                        | Y                                    | Y                                                        | Y                                                       | Y                                          | I                 |
| Turkyilmaz A et al       | Y                                                              | Y                                                            | Y                                                      | Y                                                                        | Y                                    | Y                                                        | Y                                                       | Y                                          | I                 |
| Wallberg-Jonsson S et al | Y                                                              | U                                                            | Y                                                      | Y                                                                        | Y                                    | U                                                        | Y                                                       | Y                                          | I                 |

Y: Yes; N: No; U: Unclear; NA: Not apply; I: Included. The level of evidence was II using Oxford Centre for Evidence-Based Medicine 2011 Levels of Evidence Question (OCEBM) (Is this diagnostic or monitoring test accurate?)
